# Supplementary material
Source: PubMed Central journal article supplement (PMC4479752)
Supplement: supp_mcv065_aob-15091-s1.pdf [file supp_mcv065_aob-15091-s1.pdf]

## SUPPLEMENTARY DATA

**Fig. S1** Hemiparasitic *Rhinanthus alectorolophus* and wheat as its host species during (A) the first and (B) the second physiological measurements conducted before and in peak flowering period (55 and 73 days after *Rhinanthus* sowing). Both images demonstrate the same plants cultivated under high irrigation and nutrient treatment.

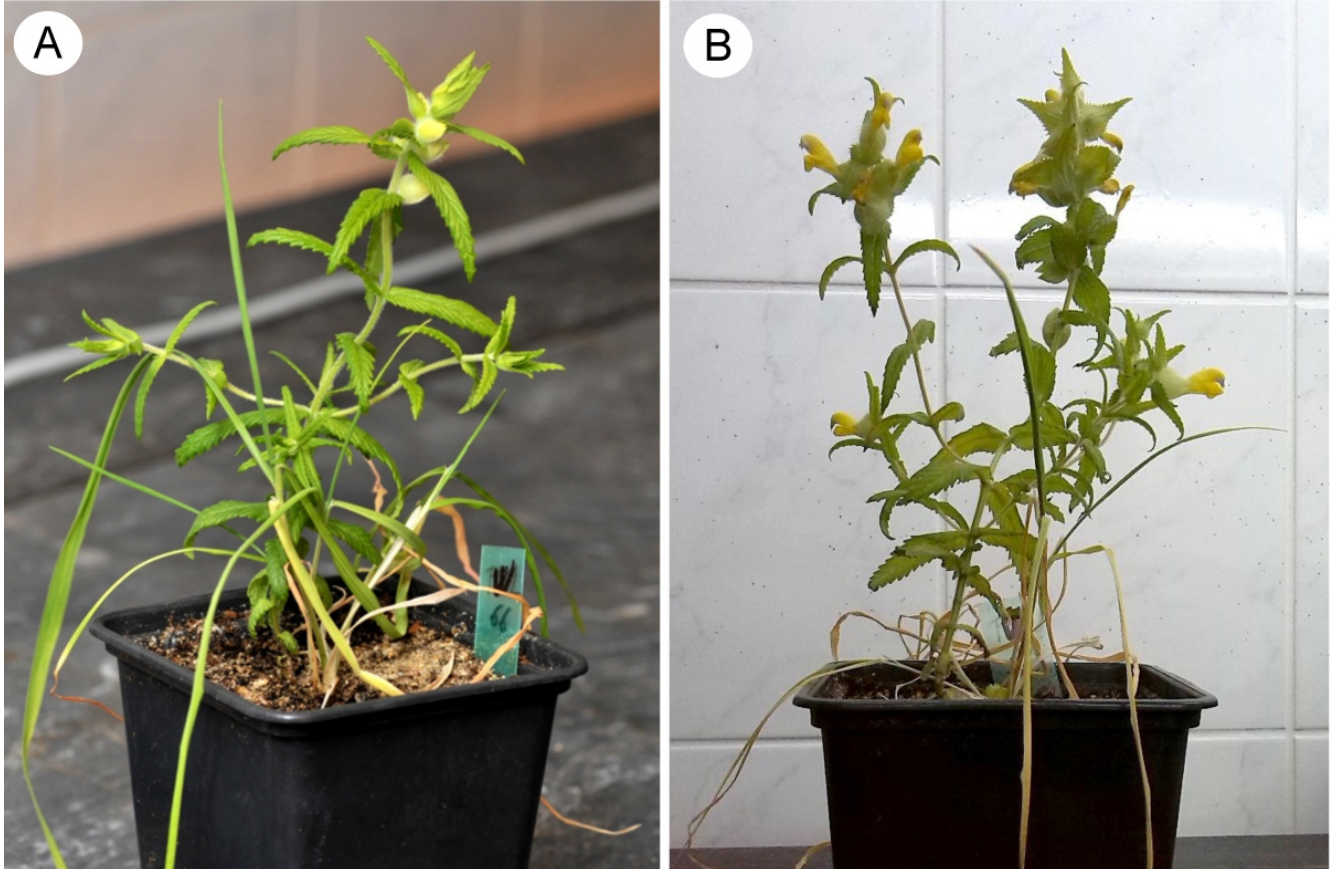

**Fig. S2** Stalked and sessile hydathode trichomes on the abaxial leaf surface of *Rhinanthus alectorolophus* in water as mounting medium. No water secretion was observed. Scale bar indicates 50  $\mu\text{m}$ .

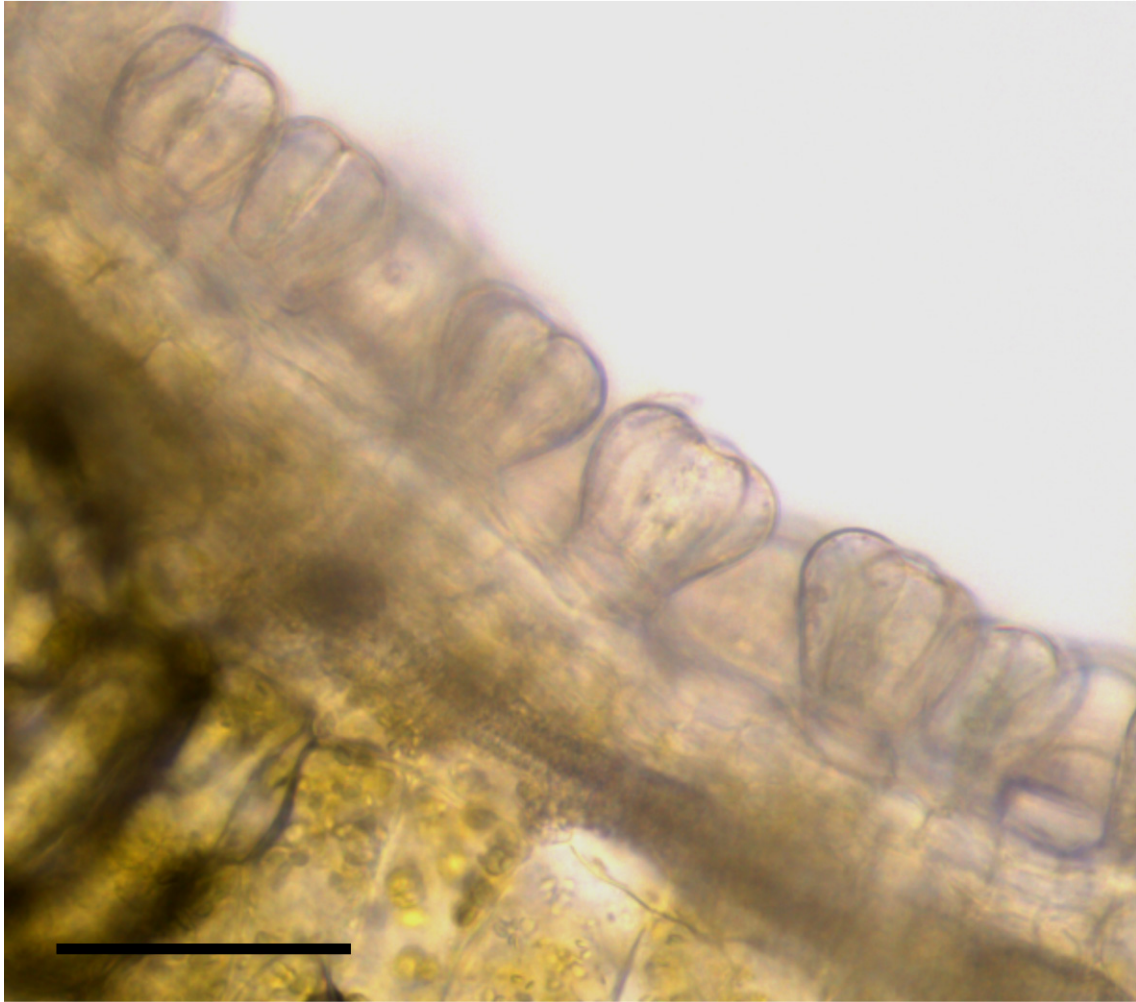

**Fig. S3** Ordination diagrams (PCA) correlating response data (respiration, transpiration, drops, and RWC – relative water content of substrate) and environmental variables (nutrient and water treatments) in (A) non-flowering and (B) flowering plants. Each symbol relates to one examined plant growing under particular treatment (N+, N-, W+, W-). Numbers add information about drops on the abaxial leaf surfaces of examined plants classified on an ordinal scale.

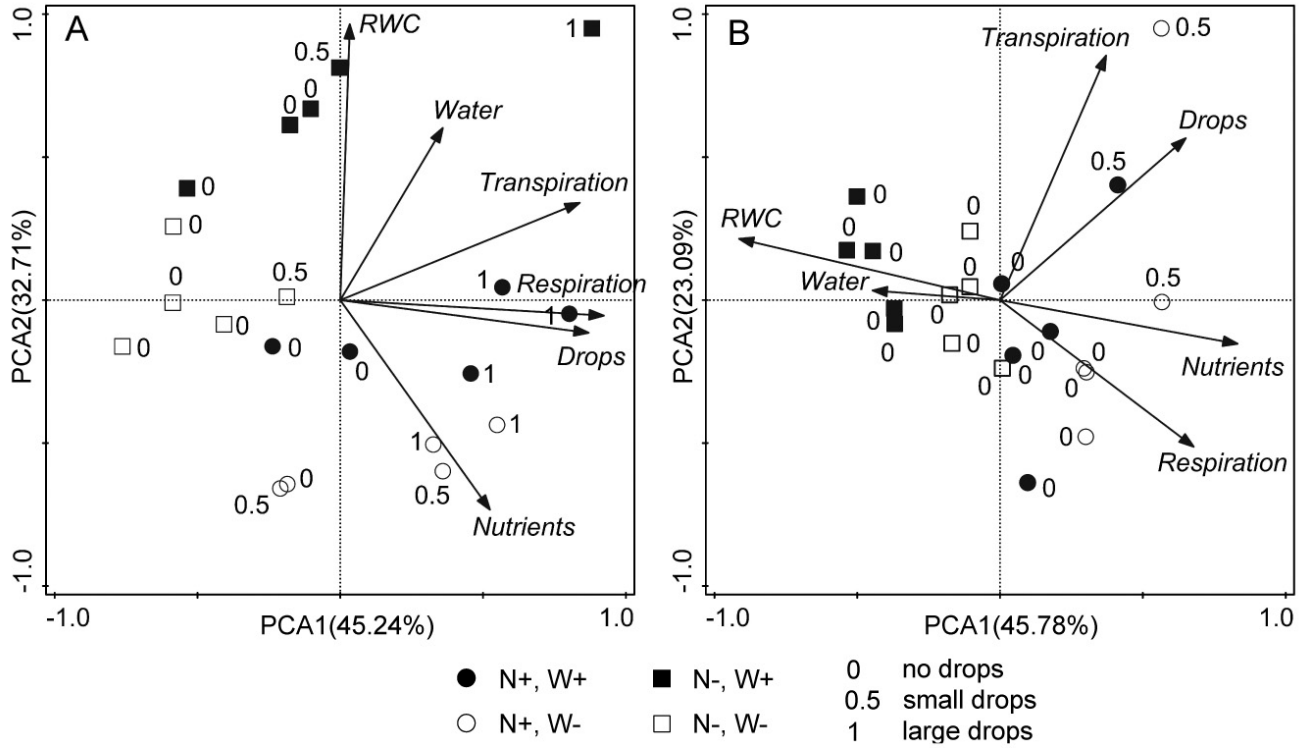

**Table S1** Primary data recorded and used for the study. Respiration rate, transpiration rate and relative water content of substrate (RWC) were measured in five non-flowering (55 DAS) and five flowering (73 DAS) plants per each treatment. DAS corresponds to days after *Rhinanthus* sowing. The leaves of examined plants were checked for water drops before the measurements and classified according to drop size and density to three groups: no drops (0), small drops (0.5), and large drops (1).

| Plant | Dataset | Treatment | Drops | Respiration ( $\mu\text{mol CO}_2 \text{ m}^{-2} \text{ s}^{-1}$ ) | Transpiration ( $\text{mmol H}_2\text{O m}^{-2} \text{ s}^{-1}$ ) | RWC (%) |
|-------|---------|-----------|-------|--------------------------------------------------------------------|-------------------------------------------------------------------|---------|
| 1     | 55 DAS  | N-, W-    | 0     | 0.31                                                               | 0.82                                                              | 10.1    |
| 2     |         |           | 0     | 0.45                                                               | 1.84                                                              | 23.1    |
| 3     |         |           | 0.5   | 1.52                                                               | 1.92                                                              | 15.4    |
| 4     |         |           | 0     | 0.52                                                               | 1.78                                                              | 13.2    |
| 5     |         |           | 0     | 1.18                                                               | 2.11                                                              | 9.8     |
| 6     |         | N-, W+    | 0.5   | 1.34                                                               | 2.52                                                              | 33      |
| 7     |         |           | 0     | 1.29                                                               | 3.16                                                              | 24.4    |
| 8     |         |           | 1     | 3.17                                                               | 4.94                                                              | 33.4    |
| 9     |         |           | 0     | 1.27                                                               | 2.67                                                              | 23.7    |
| 10    |         |           | 0     | 0.58                                                               | 1.13                                                              | 19.4    |
| 11    |         | N+, W-    | 0.5   | 1.13                                                               | 1.06                                                              | 5.6     |
| 12    |         |           | 1     | 1.79                                                               | 2.69                                                              | 8.2     |
| 13    |         |           | 1     | 1.98                                                               | 4.02                                                              | 7       |
| 14    |         |           | 0.5   | 2.88                                                               | 2.58                                                              | 4.5     |
| 15    |         |           | 0     | 1.68                                                               | 1.68                                                              | 3.5     |
| 16    |         | N+, W+    | 0     | 1.34                                                               | 0.87                                                              | 13      |
| 17    |         |           | 1     | 2.91                                                               | 3.54                                                              | 12.8    |
| 18    |         |           | 0     | 1.45                                                               | 2.67                                                              | 7       |
| 19    |         |           | 1     | 1.90                                                               | 3.34                                                              | 16.3    |
| 20    |         |           | 1     | 1.92                                                               | 2.54                                                              | 7.2     |
| 21    | 73 DAS  | N-, W-    | 0     | 1.42                                                               | 1.01                                                              | 22.4    |
| 22    |         |           | 0     | 1.73                                                               | 1.66                                                              | 29.8    |
| 23    |         |           | 0     | 2.08                                                               | 1.32                                                              | 21      |
| 24    |         |           | 0     | 1.23                                                               | 1.86                                                              | 19      |
| 25    |         |           | 0     | 1.18                                                               | 1.26                                                              | 19.9    |
| 26    |         | N-, W+    | 0     | 0.88                                                               | 1.17                                                              | 42.1    |
| 27    |         |           | 0     | 1.18                                                               | 1.40                                                              | 41.2    |
| 28    |         |           | 0     | 0.66                                                               | 1.52                                                              | 36.1    |
| 29    |         |           | 0     | 1.44                                                               | 1.16                                                              | 36      |
| 30    |         |           | 0     | 1.60                                                               | 1.11                                                              | 39.4    |
| 31    | N+, W-  | 0.5       | 2.07  | 1.28                                                               | 3.6                                                               |         |
| 32    |         | 0         | 1.76  | 1.41                                                               | 3.8                                                               |         |
| 33    |         | 0         | 1.79  | 1.41                                                               | 3.3                                                               |         |
| 34    |         | 0         | 1.98  | 0.99                                                               | 3.7                                                               |         |
| 35    |         | 0.5       | 1.44  | 3.11                                                               | 8                                                                 |         |
| 36    | N+, W+  | 0         | 1.30  | 1.63                                                               | 16.3                                                              |         |
| 37    |         | 0         | 2.05  | 0.53                                                               | 12.4                                                              |         |
| 38    |         | 0.5       | 1.74  | 1.96                                                               | 8.4                                                               |         |
| 39    |         | 0         | 1.25  | 1.09                                                               | 4.3                                                               |         |
| 40    |         | 0         | 1.91  | 1.73                                                               | 12.2                                                              |         |
